# Supplementary material for: Isoxazolone-based single crystals with large second harmonic generation effect
Source: Royal Society of Chemistry journal article supplement (doi:10.1039/c5ce01006c), 2015-01-01
Supplement: c5ce01006c1.pdf [file c5ce01006c1.pdf]

## Isoxazolone-based Single Crystals with Large Second Harmonic Generation Effect

Xinyuan Zhang,<sup>a, b</sup> Xingxing Jiang,<sup>a, b</sup> Yin Li,<sup>a</sup> Zheshuai Lin,<sup>a</sup> Guochun Zhang,<sup>a</sup> and Yicheng Wu<sup>a</sup>

<sup>a</sup>Beijing Center for Crystal Research and Development, Key Laboratory of Functional Crystals and Laser Technology, Technical Institute of Physics and Chemistry, Chinese Academy of Sciences, Beijing 100190, China

<sup>b</sup>University of Chinese Academy of Sciences, Beijing 100049, PR China

### Synthesis

(Z)-4-(4-(Dimethylamino)benzylidene)-3-phenylisoxazol-5(4H)-one (DLS):

DLS was synthesized according to the literature. The product was found to be pure and no further purification was necessary.

(Z)-4-(4-methoxybenzylidene)-3-phenylisoxazol-5(4H)-one (MLS): A mixture of 20 mmol ethyl benzoylacetate, 20 mmol hydroxylamine hydrochloride, and 11 mmol DABCO was refluxed in 50 mL ethanol for 3 min, after then 20 mmol p-methoxybenzaldehyde was added and the mixture was further refluxed for 8h. After completion of the reaction, the mixture was cooled to room temperature and the crystal product was collected by filtration. The product was found to be pure and no further purification was necessary.

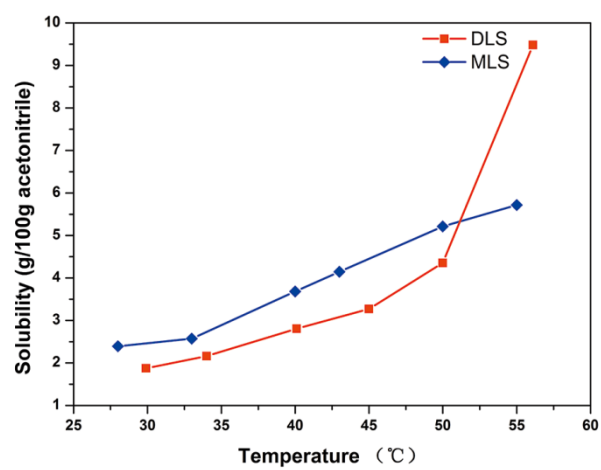

**Fig. S1** Solubility of DLS and MLS in acetonitrile.

## UV-vis Diffuse Reflectance Spectroscopy.

Fig. S2 clearly demonstrates that the short cut-off wavelengths of DLS and MLS crystals are located at 561 nm and 472 nm, respectively, corresponding to the energy band gaps of 2.21 eV and 2.63 eV as obtained by the straightforward extrapolation method.<sup>1</sup> The cut off wavelengths are consistent with transmission spectra results.

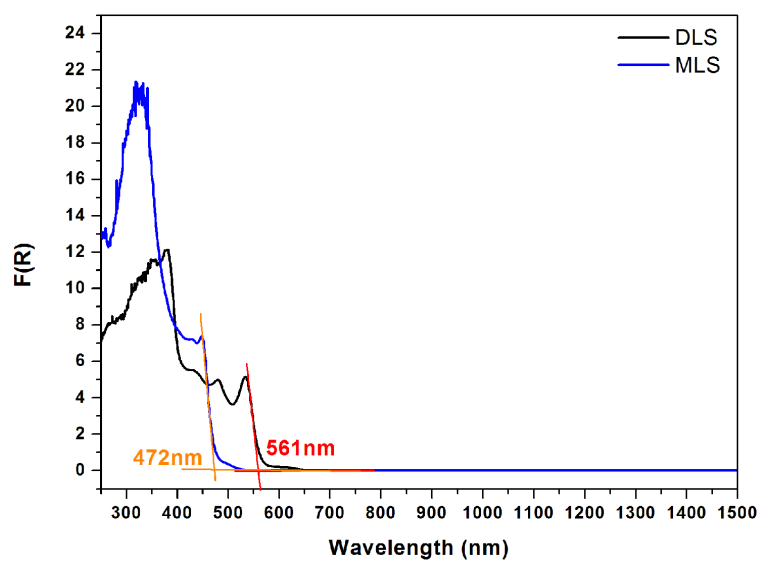

**Fig. S2** UV-vis-NIR diffuse reflectance spectra of DLS and MLS crystals.

**Table S1** The calculated first-order hyperpolarizability  $\beta$ (a.u.) of DLS and MLS in

B3LYP/6-311G\* using Gaussian03 program.

|               | DLS     | MLS     |
|---------------|---------|---------|
| $\beta_{111}$ | 334.9   | -213.27 |
| $\beta_{112}$ | -25.5   | 27.5    |
| $\beta_{113}$ | 14.1    | -21.9   |
| $\beta_{122}$ | 23 .1   | -8.1    |
| $\beta_{123}$ | 146.2   | -84.9   |
| $\beta_{133}$ | 173.6   | -29.8   |
| $\beta_{222}$ | -136.7  | 13.0    |
| $\beta_{223}$ | -706.5  | 835.7   |
| $\beta_{233}$ | 931.1   | 9.2     |
| $\beta_{333}$ | -4592.6 | 2917.9  |

**Table S2** Comparison of the SHG coefficients and SHG effect of the DAST, DSTMS, OH1, DLS, and MLS.<sup>2-3</sup>

|                         | DLS | MLS | OH1                   | DAST                  | DSTMS                 |
|-------------------------|-----|-----|-----------------------|-----------------------|-----------------------|
| SHG coefficients (pm/V) | -   | -   | $d_{33} = 120 \pm 10$ | $d_{11} = 210 \pm 55$ | $d_{11} = 214 \pm 20$ |
| Powder SHG effect       | 2.8 | 1.5 | 1                     | 3                     | 3                     |

## References

- 1 O. Schevciw, W. B. White, *Mater. Res. Bull.* 1983, **18**, 1059.
- 2 C. Hunziker, S. J. Kwon, H. Figi, F. Juvalta, O. P. Kwon, M. Jazbinsek, P. Günter, *J. Opt. Soc. Am. B.* 2008, **25**, 1678.
- 3 L. Mutter, F. D. J. Brunner, Z. Yang, M. Jazbinšek, P. Günter, *J. Opt. Soc. Am. B.*, 2007, **24**, 2556.
